# Supplementary material
Source: PubMed Central journal article supplement (PMC4250283)
Supplement: NIHMS632052-supplement-02.pdf [file NIHMS632052-supplement-02.pdf]

---

## Supplemental Methods

### *Cell Isolation and Culture*

Neonatal mouse ventricular cardiomyocyte isolation was performed in accordance with an Animal Use Protocol approved by the University of California, San Diego Institutional Animal Care and Use Committee. P1-P2 neonatal mice were sacrificed by decapitation, and the hearts excised and stored in a trypsin solution overnight at 4°C. Hearts were rinsed, then shaken at 37°C in collagenase and mixed well to digest. After arresting enzymatic activity with ice-cold media, cells were centrifuged and re-suspended in culture media, then incubated at 37°C for 90 minutes. Adherent fibroblasts were discarded, and the cardiomyocyte solution centrifuged and re-suspended for plating. Cells were plated in media based in high glucose DMEM without pyruvate, with 17% Medium 199, 10% horse serum, 5% fetal bovine serum, 100 U/ml penicillin and 50 U/ml streptomycin (Invitrogen). Cultures were maintained in a media variation with 5% horse serum and 1% fetal bovine serum, and switched to maintenance media without antibiotics at least 24 hours before optical mapping or patch clamp experiments.

### *Immunofluorescence Microscopy*

Cells were fixed in -20°C methanol for 10 minutes, and blocked for 1 hour in 3% goat serum. ar comeric  $\alpha$ -actinin (Sigma A7811, Invitrogen A11029) and connexin-43 (Sigma C6219, Dylight DI-1594) were labeled, and coverslips were mounted with mounting agent Slowfade Gold with DAPI (Life Technologies). Images of micropatterned cardiomyocyte morphology were taken on a Olympus IX81 FV1000 confocal microscope at 60x and 100x magnification (Supplemental Figure 1 and Supplemental Video) at the UCSD Light Microscopy Facility.

### *Cell Electron Microscopy*

Cell electronmicrographs were performed on samples fixed after 3 days of culture, then prepared for electron microscopy by the Farquhar Lab Electron Microscopy Core, UCSD. Images were collected by Masa Hoshijima.

## Supplemental Results

### *Micropatterned Neonatal Mouse Ventricular Myocytes are Confluent and Coupled, and Acute Stretch Increases Sarcomere Length*

Confirming the strain applied by substrate stretch is transferred to the myocytes, sarcomere lengths measured in micropatterned mouse neonatal cardiomyocyte cultures increased from  $1.8 \pm 0.02 \mu\text{m}$  to  $2.0 \pm 0.02 \mu\text{m}$  with acute anisotropic substrate stretch. Immunofluorescent imaging of confluent micropatterned cultures 3 days after plating confirms longitudinal and transverse mechanoelectric coupling, with connexin-43 expression at cell-cell junctions (**Supplement Figure 1**).

### *LV Pressure Loading Smooths Membrane Folds in Loaded Hearts*

Electron microscopy revealed significant changes in gross membrane conformation as well as density and localization of caveolae with increased ventricular pressure load (**Supplement Fig. S2**). The ratio of membrane length to absolute length (ML/AL) was measured as a quantification of slack membrane folds (**Supplement Figs S2A and S2B**). In the pressure-loaded WT heart, the ML/AL ratio decreased from  $1.140 \pm 0.019$  in the unloaded state to  $1.025 \pm 0.004$  in the loaded state (N=20, P<0.001). In the WT heart

---

fixed after load had been applied and removed, the average ML/AL ratio was  $1.162 \pm 0.022$  (N=10, P=N.S. vs. the initial measurement). In M $\beta$ CD-treated hearts, the average ML/AL ratio was  $1.094 \pm 0.010$  in the unloaded preparation (N=10, P=N.S. compared with WT) and was also significantly reduced in the loaded state (N=10,  $1.046 \pm 0.009$ ,  $P < 0.01$  vs. unloaded M $\beta$ CD-treated). ML/AL was not significantly different between the unloaded Cav3 KO heart and the unloaded WT heart (N=10,  $1.178 \pm 0.026$ , P=N.S.) but was significantly reduced in the pressure-loaded Cav3 KO heart (N=10,  $1.051 \pm 0.008$ ,  $P < 0.001$  vs. unloaded Cav3 KO).

### Supplemental Figures

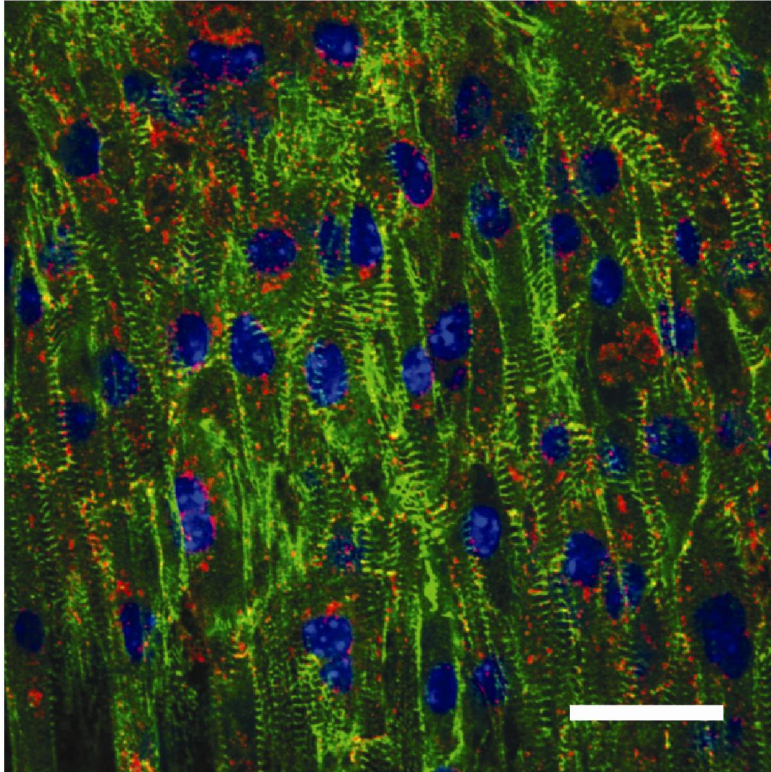

**Figure S1:** Immunofluorescently labeled NMVMS, cultured on micropatterned substrate for 3 days after isolation and imaged using a FV1000 microscope at 60x magnification. Green:  $\alpha$ -actinin, red: connexin-43, blue: DAPI. Scale 30  $\mu$ m.

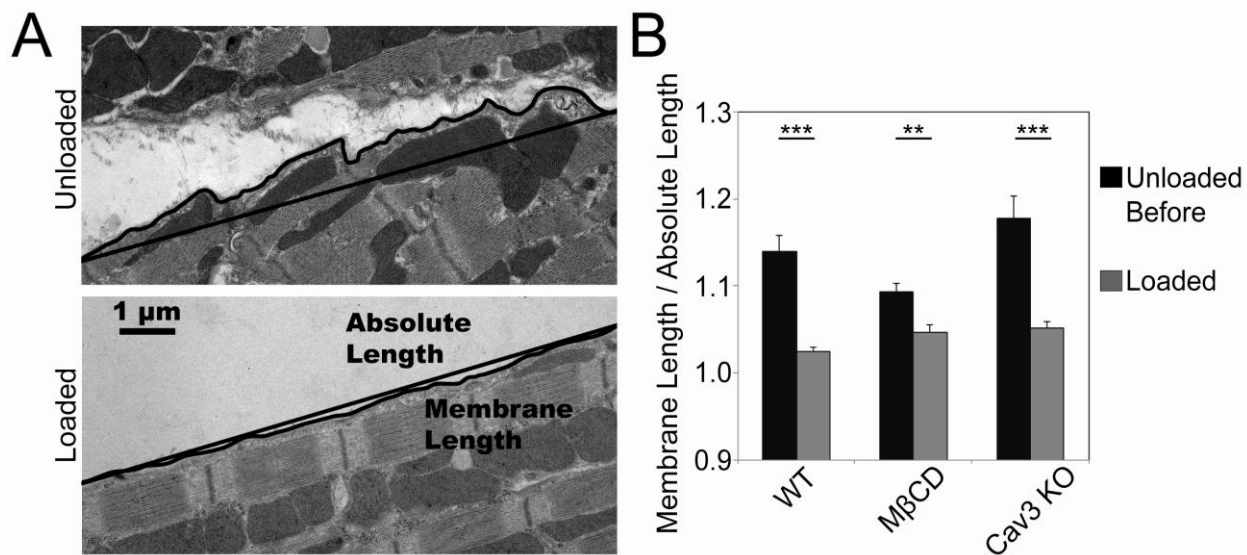

**Figure S2:** Stretch unfolds myocyte membrane in loaded hearts. (A) Excess folds in the sarcolemma of wild-type hearts are flattened during pressure load (lower micrograph) compared with the unloaded state (upper micrograph), as assessed by transmission electron microscopy (scale: 1  $\mu$ m). (B) Membrane length-to-absolute length ratio was used to quantify slack membrane reduction in the loaded vs. unloaded WT ( $P < 0.001$ ), M $\beta$ CD-treated ( $P < 0.01$ ), and Cav3 KO ( $P < 0.001$ ) hearts. (N=10 images per condition, comparison by unpaired t-test).

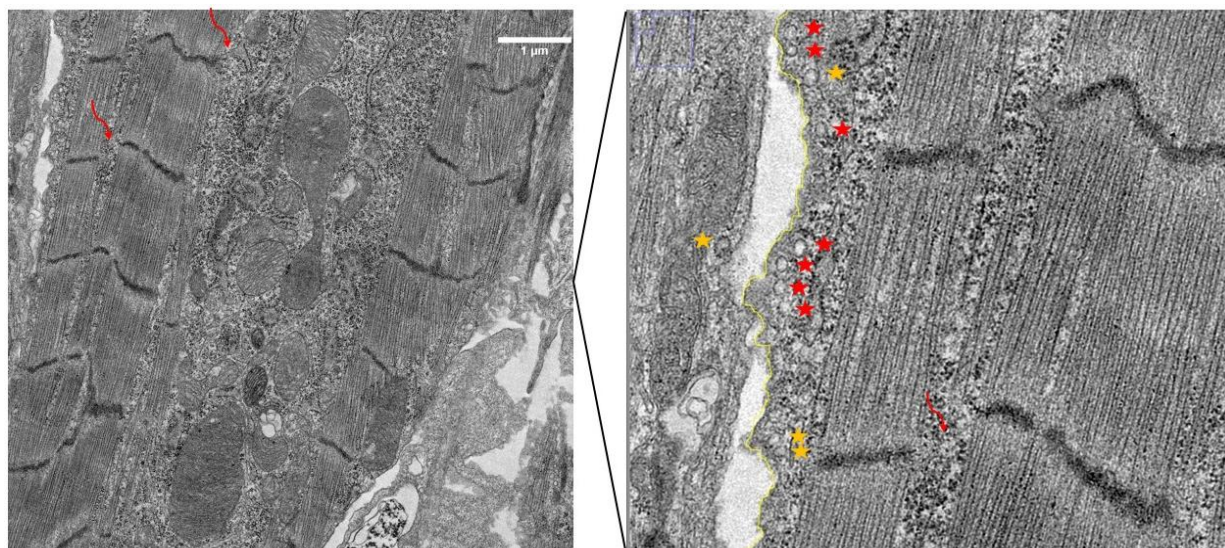

**Figure S3:** Electron micrograph of NMVM cultured on micropatterned PDMS for three days. Image enlarged on the right, with indications for sub-sarcolemmal (red stars) and integrated (yellow stars) caveolae, as well as structures resembling an immature t-tubule system (red arrows). Scale is 1  $\mu$ m.

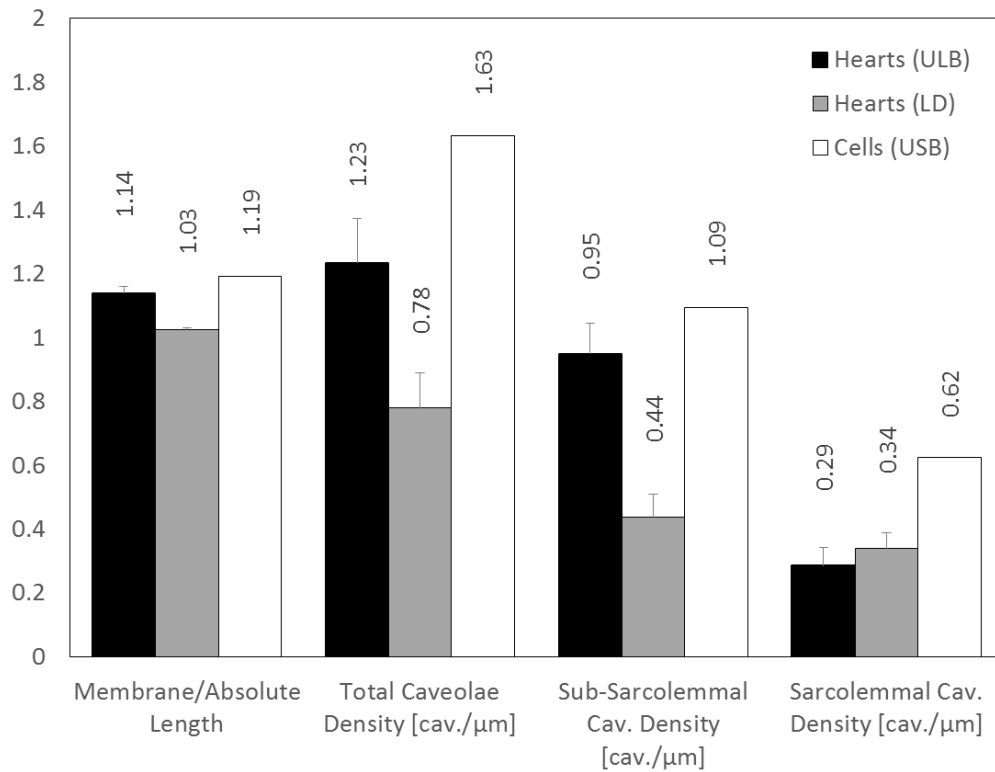

**Figure S4:** Micropatterned unstretched NMVM electronmicrograph measurements of membrane length per absolute length and caveolae density and distribution (N=1) are similar to those observed in unloaded adult mouse heart tissue (N=10 each, ULB and LD).

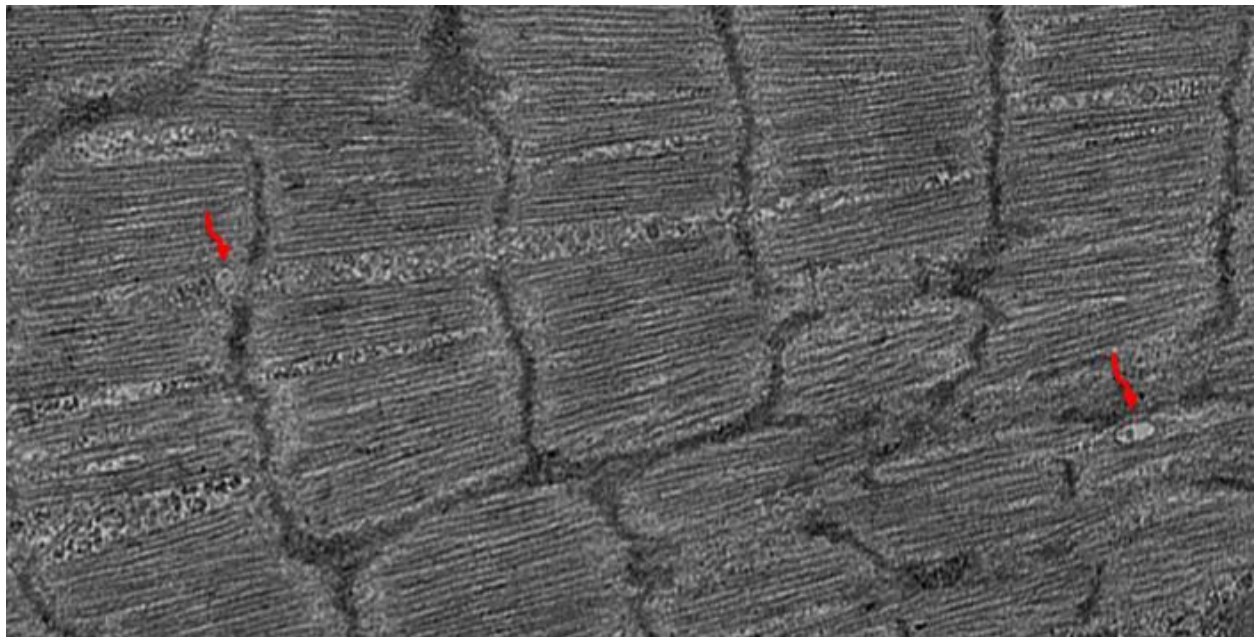

**Figure S5:** Electron micrograph of micropatterned cells, with arrows indicating structures resembling immature t-tubules.

**Supplemental Video**

Confocal stack of Cav3 KO NMVMs, fixed after three days in micropatterned culture and labeled identically to Figure S1. Imaged using a FV1000 microscope at 100x magnification. Single slice below:

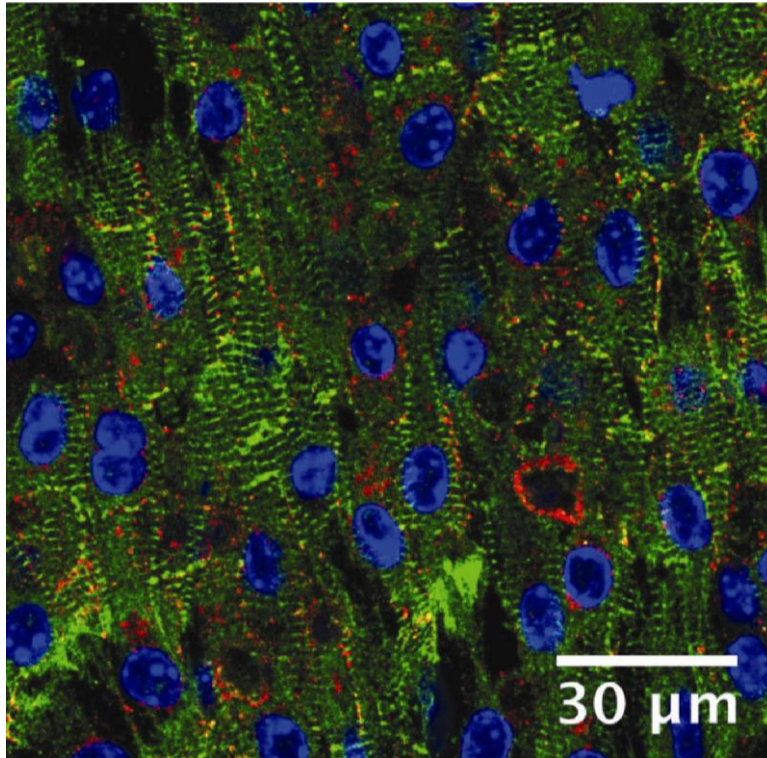

## Supplemental Tables

**Table S1:** Optical mapping data.

| OPTICAL MAPPING |      |         |     |     |        |         |     |     |        |         |     |     |        |      |     |     |        |
|-----------------|------|---------|-----|-----|--------|---------|-----|-----|--------|---------|-----|-----|--------|------|-----|-----|--------|
|                 |      | Control |     |     |        | Gd3+    |     |     |        | Cav3 KO |     |     |        | MβCD |     |     |        |
| Hearts CVmax    |      | ULB     | LD  | ULA | LD/ULB | ULB     | LD  | ULA | LD/ULB | ULB     | LD  | ULA | LD/ULB | ULB  | LD  | ULA | LD/ULB |
| [mm/s]          | mean | 653     | 529 | 678 | 0.81   | 458     | 340 | 478 | 0.73   | 591     | 572 | 604 | 0.97   | 691  | 692 | 684 | 1.00   |
|                 | sem  | 16      | 21  | 17  | 0.05   | 45      | 55  | 69  | 0.09   | 21      | 30  | 47  | 0.04   | 16   | 42  | 18  | 0.05   |
|                 | n    | 5       |     |     |        | 5       |     |     |        | 5       |     |     |        | 5    |     |     |        |
|                 |      | Control |     |     |        | GsMTx-4 |     |     |        | Cav3 KO |     |     |        |      |     |     |        |
| Cells CVmax     |      | USB     | ST  | USA | ST/USB | USB     | ST  | USA | ST/USB | USB     | ST  | USA | ST/USB |      |     |     |        |
| [mm/s]          | mean | 325     | 248 | 294 | 0.75   | 1017    | 840 | 922 | 0.81   | 503     | 553 | 549 | 1.14   |      |     |     |        |
|                 | sem  | 30      | 33  | 34  | 0.04   | 343     | 321 | 143 | 0.05   | 96      | 83  | 70  | 0.18   |      |     |     |        |
|                 | n    | 8       |     |     |        | 3       |     |     |        | 3       |     |     |        |      |     |     |        |

**Table S2:** Electron microscopy, patch clamp, and lipophilic dye data.

| <b>ELECTRON MICROSCOPY</b> |      |         |        |         |          |          |        |              |      |
|----------------------------|------|---------|--------|---------|----------|----------|--------|--------------|------|
|                            |      | Control |        |         | Cav3 KO  |          |        | M $\beta$ CD |      |
|                            |      | ULB     | LD     | ULA     | ULB      | LD       | ULB    | LD           |      |
| ML/AL                      |      |         |        |         |          |          |        |              |      |
|                            | mean | 1.14    | 1.03   | 1.16    | 1.18     | 1.05     | 1.09   | 1.05         |      |
|                            | sem  | 0.02    | 0.00   | 0.02    | 0.03     | 0.01     | 0.01   | 0.01         |      |
| n                          |      | 10      | 10     | 10      | 10       | 10       | 10     | 10           |      |
| Total Caveolae             |      |         |        |         |          |          |        |              |      |
| [Cav./ $\mu$ m]            | mean | 1.23    | 0.78   | 1.27    | 0.12     | 0.10     | 0.42   | 0.17         |      |
|                            | sem  | 0.14    | 0.11   | 0.10    | 0.02     | 0.03     | 0.04   | 0.04         |      |
| Sub-Sarcolemmal Caveolae   |      |         |        |         |          |          |        |              |      |
| [Cav./ $\mu$ m]            | mean | 0.95    | 0.44   | 1.05    | 0.11     | 0.07     | 0.28   | 0.08         |      |
|                            | sem  | 0.09    | 0.07   | 0.09    | 0.01     | 0.02     | 0.03   | 0.02         |      |
| Sarcolemmal Caveolae       |      |         |        |         |          |          |        |              |      |
| [Cav./ $\mu$ m]            | mean | 0.29    | 0.34   | 0.22    | 0.01     | 0.04     | 0.14   | 0.08         |      |
|                            | sem  | 0.06    | 0.05   | 0.03    | 0.01     | 0.02     | 0.03   | 0.03         |      |
| n                          |      | 10      | 10     | 10      | 10       | 10       | 10     | 10           |      |
| <b>PATCH CLAMP</b>         |      |         |        |         |          |          |        |              |      |
|                            |      | Control |        | GsMTx-4 |          | Cav3 KO  |        | M $\beta$ CD |      |
| Capacitance, Cm            |      | USB     | ST     | USB     | ST       | USB      | ST     | USB          | ST   |
| [pF]                       | mean | 21.9    | 43.4   | 16.0    | 39.9     | 13.7     | 16.3   | 12.1         | 24.9 |
|                            | sem  | 2.9     | 8.2    | 2.1     | 4.4      | 1.5      | 2.9    | 0.8          | 3.9  |
| Resistance, Rm             |      |         |        |         |          |          |        |              |      |
| [G $\Omega$ ]              | mean | 1.0     | 2.3    | 1.9     | 1.6      | 1.2      | 1.6    | 1.7          | 1.2  |
|                            | sem  | 0.3     | 0.8    | 0.2     | 0.6      | 0.4      | 0.8    | 0.2          | 0.2  |
| Time Constant, Tm          |      |         |        |         |          |          |        |              |      |
| [ms]                       | mean | 20.2    | 77.9   | 29.3    | 61.9     | 22.1     | 23.2   | 21.2         | 24.9 |
|                            | sem  | 6.2     | 26.4   | 5.2     | 22.3     | 12.5     | 11.9   | 3.5          | 5.7  |
|                            | n    | 15      | 15     | 11      | 8        | 13       | 12     | 18           | 22   |
| <b>LIPOPHILIC DYE</b>      |      |         |        |         |          |          |        |              |      |
|                            |      | Control |        |         | Cav3 KO  |          |        |              |      |
| Fluo./Area                 |      | USB     | ST     | ST/USB  | USB      | ST       | ST/USB |              |      |
| [A.U.]                     | mean | 302.52  | 556.32 | 1.84    | 1077.607 | 1060.779 | 0.98   |              |      |
|                            | sem  | 41.72   | 90.04  | 0.39    | 342.81   | 352.85   | 0.45   |              |      |
|                            | n    | 9       | 9      | 9       | 6        | 6        | 6      |              |      |
